# Supplementary material
Source: PubMed Central journal article supplement (PMC9166327)

## Online Supplement

### Characterizing COPD Symptom Variability in the Stable State Utilizing the Evaluating Respiratory Symptoms in COPD Questionnaire

Jamuna K. Krishnan, MD<sup>1\*</sup> Kayley M. Ancy<sup>2\*</sup> Clara Oromendia<sup>3</sup>, Katherine L. Hoffman, PhD<sup>3</sup> Imaani Easthausen<sup>3</sup> Nancy K. Leidy, PhD<sup>4</sup> MeiLan K. Han, MD, MS<sup>5</sup> Russell P. Bowler, MD, PhD<sup>6</sup> Stephanie A. Christenson, MD<sup>7</sup> David J. Couper, PhD<sup>8</sup> Gerard J. Criner, MD<sup>9</sup> Jeffrey L. Curtis, MD<sup>5,10</sup> Mark T. Dransfield, MD<sup>11</sup> Nadia N. Hansel, MD, MPH<sup>12</sup> Anand S. Iyer<sup>11</sup>, Robert Paine III, MD<sup>13</sup> Stephen P. Peters, MD, PhD<sup>14</sup> Jadwiga A. Wedzicha, MD<sup>15</sup> Prescott G. Woodruff, MD, MPH<sup>7</sup> Karla V. Ballman<sup>3</sup> Fernando J. Martinez, MD, MS<sup>1</sup> for the SPIROMICS Investigators

*\*Co-first authors, both authors contributed equally to the work.*

<sup>1</sup> Pulmonary and Critical Care Medicine, Weill Cornell Medicine, New York, New York, United States

<sup>2</sup> Department of Medicine, Weill Cornell Medicine, New York, New York, United States

<sup>3</sup> Division of Biostatistics, Department of Population Health Sciences, Weill Cornell Medical College, New York, New York, United States

<sup>4</sup> Evidera, Bethesda, Maryland, United States

<sup>5</sup> Internal Medicine, University of Michigan Health System, Ann Arbor, Michigan, United States

<sup>6</sup> Department of Medicine, National Jewish Medical and Research Center, Denver, Colorado, United States

<sup>7</sup> Pulmonary and Critical Care, University of California San Francisco, San Francisco, California, United States

<sup>8</sup> University of North Carolina at Chapel Hill, Chapel Hill, North Carolina, United States

<sup>9</sup> Pulmonary and Critical Care Medicine, Temple University Hospital, Philadelphia, Pennsylvania, United States

<sup>10</sup> Medical Service, VA Ann Arbor Healthcare System, Ann Arbor, Michigan, United States

<sup>11</sup> Pulmonary, Allergy and Critical Care, University of Alabama at Birmingham, Birmingham, Alabama, United States

<sup>12</sup> Division of Pulmonary and Critical Care Medicine, Johns Hopkins University, Baltimore Maryland, United States

<sup>13</sup> Division of Pulmonary and Critical Care Medicine, Department of Veterans Affairs Medical Center, University of Utah, Salt Lake City, Utah, United States

<sup>14</sup> Section on Pulmonary, Critical Care, Allergy and Immunological Diseases, Wake Forest School of Medicine Medical Center, Winston-Salem, North Carolina, United States

<sup>15</sup> National Heart and Lung Institute, Imperial College London, United Kingdom

## Supplementary Tables

**Table E1. Comparison of included and excluded subjects in the symptom variability analysis**

| Characteristic                                                                 | Included    | Excluded    | Overall     |
|--------------------------------------------------------------------------------|-------------|-------------|-------------|
| N                                                                              | 140 [68.3%] | 65 [31.7%]  | 205         |
| Age (years)                                                                    | 63.3 ±8.4   | 63.3 ±7.6   | 63.3 ±8.1   |
| Female sex, n [%]                                                              | 74 [52.9%]  | 29 [44.6%]  | 103 [50.2%] |
| BMI* (kg/m <sup>2</sup> )                                                      | 27.5 ±5.5   | 27.2 ±5.5   | 27.4 ±5.5   |
| Six-minute walk distance (10m)                                                 | 36.2 ±12.3  | 38.7 ±12.5  | 37.0 ±12.4  |
| FEV <sub>1</sub> <sup>†</sup> % predicted                                      | 61.5 ±21.9  | 65.0 ±21.9  | 62.6 ±21.8  |
| BODE <sup>‡</sup> Index                                                        | 2.3 ±2.2    | 1.8 ±2.1    | 2.1 ±2.2    |
| MMRC <sup>§</sup> dyspnea scale                                                | 1.4 ±1.1    | 1.0 ±1.0    | 1.3 ±1.0    |
| PSQ <sup>  </sup> total score                                                  | 6.9 ±3.8    | 7.2 ±4.6    | 7.0 ±3.9    |
| SGRQ <sup>**</sup> total score                                                 | 42.9 ±19.9  | 36.5 ±19.9  | 41.1 ±21.0  |
| HADS <sup>††</sup> anxiety score                                               | 6.2 ±4.0    | 5.6 ±4.0    | 6.0 ±4.0    |
| HADS <sup>††</sup> depression score                                            | 4.9 ±3.7    | 4.5 ±3.3    | 4.8 ±3.5    |
| Current smoker                                                                 | 47 [33.8%]  | 27 [41.5%]  | 74 [36.3%]  |
| GOLD <sup>‡‡</sup> stage, n [%]                                                |             |             |             |
| Stage I                                                                        | 11 [7.9%]   | 4 [6.3%]    | 15 [7.4%]   |
| Stage II                                                                       | 31 [22.3%]  | 14 [21.5%]  | 45 [22.1%]  |
| Stage III                                                                      | 67 [48.2%]  | 29 [44.6%]  | 96 [47.1%]  |
| Stage IV                                                                       | 30 [21.6%]  | 18 [23.8%]  | 48 [23.5%]  |
| Unavailable                                                                    | 1 [0.7%]    | 0 [3.1%]    | 1 [0.5%]    |
| EXACT <sup>§§</sup> mean                                                       | 35.2 ±11.0  | 33.4 ±13.1  | 34.7 ±11.5  |
| E-RS <sup>Δ</sup> mean                                                         | 11.4 ±6.6   | 9.9 ±7.5    | 11.0 ±6.9   |
| E-RS <sup>Δ</sup> subscales                                                    |             |             |             |
| E-RS breathlessness                                                            | 5.6 ±3.8    | 4.9 ±4.2    | 5.4 ±4.0    |
| E-RS cough/sputum                                                              | 3.2 ±1.9    | 2.9 ±1.9    | 3.1 ±1.9    |
| E-RS chest                                                                     | 2.6 ±2.0    | 2.2 ±2.1    | 2.4 ±2.0    |
| WS-SD <sup>ΔΔ</sup> at baseline                                                | 3.04 ± 1.52 | 2.55 ± 1.74 | 2.89 ± 1.60 |
| HCRU <sup>^</sup> Exacerbations                                                | 18 [12.9%]  | 3[4.6%]     | 21[10.2%]   |
| EXACT <sup>§§</sup> event within 4 weeks of follow-up (1 or more event), n [%] | 45 [32.1%]  | 5 [7.7%]    | 50 [24.4%]  |

\*BMI = Body mass index; <sup>†</sup>FEV1 = Forced expiratory volume in one second; <sup>‡</sup>BODE = Body mass index, airflow obstruction, dyspnea and exercise capacity; <sup>§</sup>MMRC = Modified Medical Research Council; <sup>||</sup>PSQ = Pittsburgh Sleep Quality Index; <sup>\*\*</sup>SGRQ = St. George Respiratory Questionnaire; <sup>††</sup>HADS = hospital anxiety and depression scale; <sup>‡‡</sup>GOLD = Global Initiative For Chronic Obstructive Lung Disease; <sup>§§</sup>EXACT = Exacerbations of Chronic Pulmonary Disease Tool; <sup>Δ</sup>E-RS = Evaluating Respiratory Symptoms in COPD Tool; <sup>ΔΔ</sup>WS-SD = Within-subject standard deviation; <sup>^</sup>HCRU = Healthcare resource utilization exacerbations in the 52 weeks following Exacerbation sub study enrollment.

**Table E2. Pair wise differences in weekly WS-SD\* among 130 subjects with sufficient data in 12 weeks**

| Start Week | End Week                     |                 |                                 |                                 |                                 |                                 |                                 |                                 |                                 |                                 |                                 |                                 |
|------------|------------------------------|-----------------|---------------------------------|---------------------------------|---------------------------------|---------------------------------|---------------------------------|---------------------------------|---------------------------------|---------------------------------|---------------------------------|---------------------------------|
|            | 1                            | 2               | 3                               | 4                               | 5                               | 6                               | 7                               | 8                               | 9                               | 10                              | 11                              | 12                              |
| 0          | 0.07<br>p <sup>†</sup> =0.71 | -0.05<br>p=0.72 | <b>-0.34</b><br>p= <b>0.025</b> | <b>-0.45</b><br>p= <b>0.006</b> | <b>-0.4</b><br>p= <b>0.007</b>  | <b>-0.6</b><br>p< <b>0.001</b>  | <b>-0.78</b><br>p< <b>0.001</b> | <b>-0.57</b><br>p< <b>0.001</b> | <b>-0.67</b><br>p< <b>0.001</b> | <b>-0.48</b><br>p= <b>0.007</b> | <b>-0.62</b><br>p< <b>0.001</b> | <b>-0.64</b><br>p< <b>0.001</b> |
| 1          |                              | -0.12<br>p=0.53 | <b>-0.4</b><br>p= <b>0.035</b>  | <b>-0.52</b><br>p= <b>0.007</b> | <b>-0.46</b><br>p= <b>0.008</b> | <b>-0.66</b><br>p< <b>0.001</b> | <b>-0.85</b><br>p< <b>0.001</b> | <b>-0.64</b><br>p= <b>0.001</b> | <b>-0.74</b><br>p< <b>0.001</b> | <b>-0.55</b><br>p= <b>0.006</b> | <b>-0.69</b><br>p< <b>0.001</b> | <b>-0.7</b><br>p< <b>0.001</b>  |
| 2          |                              |                 | <b>-0.28</b><br>p= <b>0.039</b> | <b>-0.39</b><br>p= <b>0.02</b>  | <b>-0.34</b><br>p= <b>0.014</b> | <b>-0.54</b><br>p< <b>0.001</b> | <b>-0.73</b><br>p< <b>0.001</b> | <b>-0.52</b><br>p< <b>0.001</b> | <b>-0.62</b><br>p< <b>0.001</b> | <b>-0.42</b><br>p= <b>0.014</b> | <b>-0.57</b><br>p< <b>0.001</b> | <b>-0.58</b><br>p< <b>0.001</b> |
| 3          |                              |                 |                                 | -0.11<br>p=0.48                 | -0.06<br>p=0.66                 | -0.26<br>p=0.075                | <b>-0.45</b><br>p= <b>0.003</b> | -0.23<br>p=0.095                | <b>-0.33</b><br>p= <b>0.032</b> | -0.14<br>p=0.41                 | -0.28<br>p=0.087                | -0.3<br>p=0.056                 |
| 4          |                              |                 |                                 |                                 | 0.05<br>p=0.69                  | -0.15<br>p=0.30                 | <b>-0.34</b><br>p= <b>0.022</b> | -0.12<br>p=0.38                 | -0.22<br>p=0.11                 | -0.03<br>p=0.86                 | -0.17<br>p=0.28                 | -0.19<br>p=0.24                 |
| 5          |                              |                 |                                 |                                 |                                 | -0.2<br>p=0.078                 | <b>-0.39</b><br>p= <b>0.03</b>  | -0.17<br>p=0.17                 | <b>-0.27</b><br>p= <b>0.03</b>  | -0.08<br>p=0.60                 | -0.22<br>p=0.11                 | -0.24<br>p=0.095                |
| 6          |                              |                 |                                 |                                 |                                 |                                 | -0.19<br>p=0.14                 | 0.02<br>p=0.85                  | -0.07<br>p=0.57                 | 0.12<br>p=0.44                  | -0.03<br>p=0.85                 | -0.04<br>p=0.77                 |
| 7          |                              |                 |                                 |                                 |                                 |                                 |                                 | 0.21<br>p=0.11                  | 0.11<br>p=0.42                  | 0.31<br>p=0.068                 | 0.16<br>p=0.26                  | 0.15<br>p=0.28                  |
| 8          |                              |                 |                                 |                                 |                                 |                                 |                                 |                                 | -0.1<br>p=0.42                  | 0.09<br>p=0.55                  | -0.05<br>p=0.71                 | -0.07<br>p=0.66                 |
| 9          |                              |                 |                                 |                                 |                                 |                                 |                                 |                                 |                                 | 0.19<br>p=0.20                  | 0.05<br>p=0.73                  | 0.03<br>p=0.82                  |
| 10         |                              |                 |                                 |                                 |                                 |                                 |                                 |                                 |                                 |                                 | -0.14<br>p=0.37                 | -0.16<br>p=0.31                 |
| 11         |                              |                 |                                 |                                 |                                 |                                 |                                 |                                 |                                 |                                 |                                 | -0.02<br>p=0.91                 |

\*WS-SD = within subject standard deviation. †all p-values indicate paired t-tests, bold indicates statistical significance.

## SUPPLEMENTARY FIGURES

**Figure E1.** Example of one subject's E-RS scores throughout the study with standard deviation (blue dashed line) decreasing throughout the weeks. Day -7 to day 0 represents the baseline week. Mean E-RS score (red line) demonstrates more stability during the same time period. E-RS = Evaluating Respiratory Symptoms in COPD Tool. WS-SD = within subject standard deviation

**Figure E2.** Mean WS-SD of subjects over twelve weeks of follow-up after baseline week. Grey lines indicate each individual subject's WS-SD trajectory over the 13 weeks. WS-SD = within subject standard deviation

**Figure E3.** Example of two subject's daily EXACT scores leading to the onset and recovery of an EXACT event.

**Figure E1**

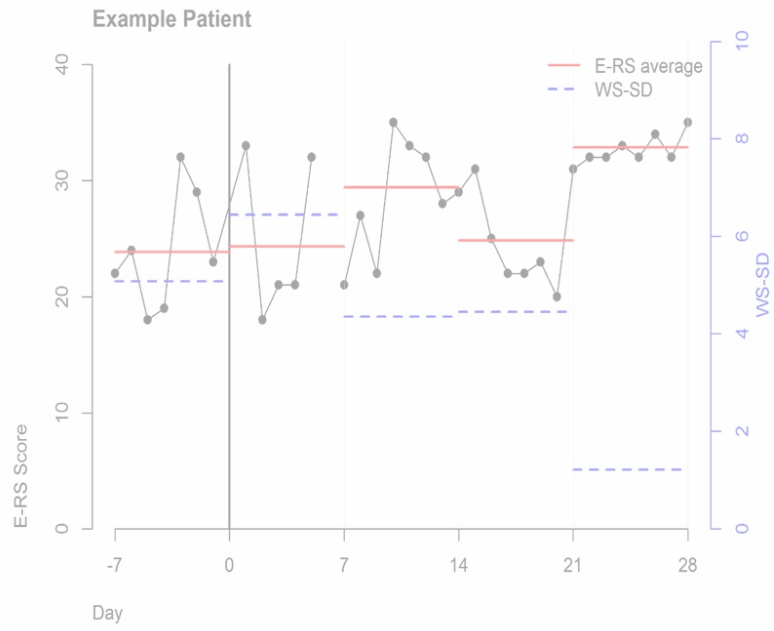

**Figure E2**

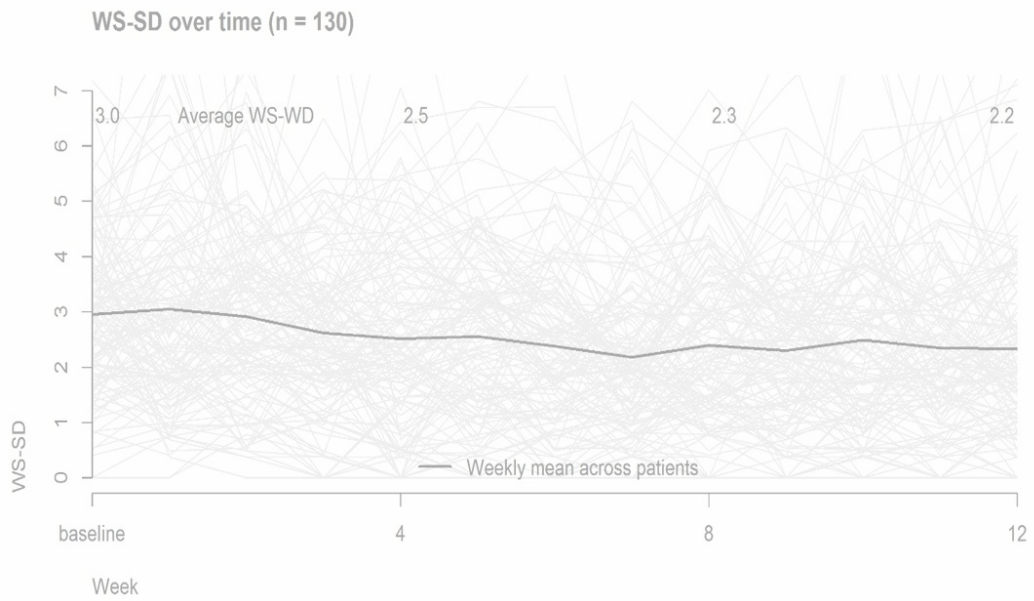

**Figure E3**

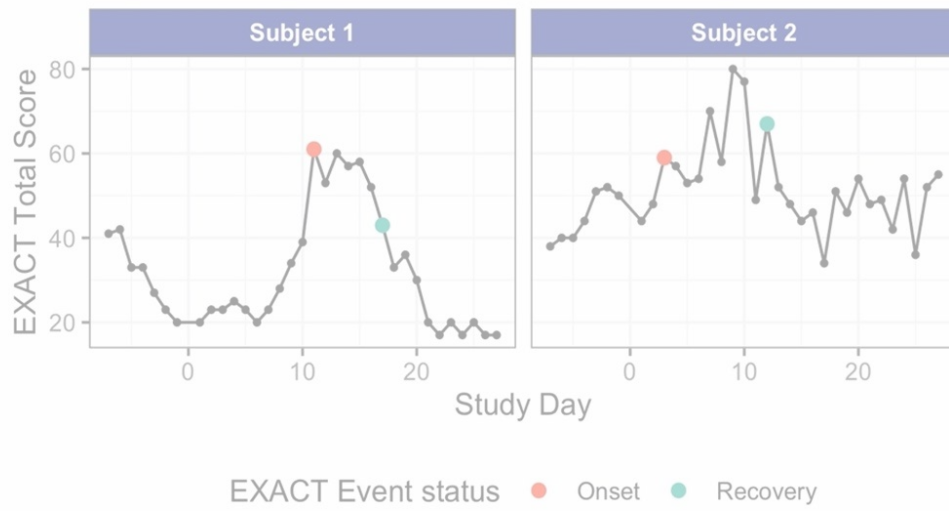

Supplement: JCOPDF-9-195-s001.pdf [file JCOPDF-9-195-s001.pdf]
